# Supplementary material
Source: ML conference proceedings conference paper supplement (https://openreview.net/forum?id=497CevPdOg)
Supplement: supplementary_material [file attachment]

## A Proofs

**Theorem 1.** Let the parameters of InDI [9] in Table 1 be  $t := \frac{\gamma_t^2}{\gamma_t^2 + \bar{\gamma}_t^2}$ ,  $\epsilon_t^2 := \frac{\bar{\gamma}_t^2}{\gamma_t^2}(\gamma_t^2 + \bar{\gamma}_t^2)$ . Then, InDI and I<sup>2</sup>SB are equivalent.

*Proof.* In order to proceed with the proof, we first remind the notations from Table 1:

$$\gamma_t^2 := \int_0^t \beta_\tau d\tau, \quad \bar{\gamma}_t^2 := \int_t^1 \beta_\tau d\tau. \quad (17)$$

By definition, we note that  $\gamma_t^2 + \bar{\gamma}_t^2 = \int_0^1 \beta_\tau d\tau$  is constant for any choice of  $t \in [0, 1]$ . To proceed with the proof, we have for  $\alpha_{s|t}^2$ ,

$$s/t = \frac{\gamma_s^2}{\gamma_s^2 + \bar{\gamma}_s^2} / \frac{\gamma_t^2}{\gamma_t^2 + \bar{\gamma}_t^2} = \frac{\gamma_s^2}{\gamma_t^2}. \quad (18)$$

Considering  $\sigma_{s|t}^2$ ,

$$s^2(\epsilon_s^2 - \epsilon_t^2) = \frac{\gamma_s^4}{(\gamma_s^2 + \bar{\gamma}_s^2)^2} \left( \frac{\bar{\gamma}_s^2}{\gamma_s^2}(\gamma_s^2 + \bar{\gamma}_s^2) - \frac{\bar{\gamma}_t^2}{\gamma_t^2}(\gamma_t^2 + \bar{\gamma}_t^2) \right) \quad (19)$$

$$= \frac{\gamma_s^4}{\gamma_s^2 + \bar{\gamma}_s^2} \left( \frac{\bar{\gamma}_s^2}{\gamma_s^2} - \frac{\bar{\gamma}_t^2}{\gamma_t^2} \right) \quad (20)$$

$$= \frac{\gamma_s^2}{\gamma_s^2 + \bar{\gamma}_s^2} \left( \frac{\bar{\gamma}_s^2 \gamma_t^2 - \bar{\gamma}_t^2 \gamma_s^2}{\gamma_t^2} \right) \quad (21)$$

$$\stackrel{(a)}{=} \frac{\gamma_s^2}{\gamma_s^2 + \bar{\gamma}_s^2} \frac{d_s^2(\gamma_t^2 + \bar{\gamma}_t^2)}{\gamma_t^2} \quad (22)$$

$$= \frac{\gamma_s^2}{\gamma_t^2} d_s^2 \quad (23)$$

$$= \frac{\gamma_s^2}{\gamma_t^2} (\gamma_t^2 - \gamma_s^2), \quad (24)$$

where in (a), we defined  $d_s^2 := \int_s^t \beta_\tau d\tau$  such that  $\gamma_s^2 + d_s^2 = \gamma_t^2$  is satisfied.  $\square$

**Theorem 2.** The total variance condition (12) is satisfied for both I<sup>2</sup>SB and InDI.

*Proof.* Here, we further show that the condition is satisfied for I<sup>2</sup>SB for completeness.

$$\sigma_s^2 - (\alpha_{s|t}^2)^2 \sigma_t^2 = \frac{\gamma_s^2 \bar{\gamma}_s^2}{\gamma_s^2 + \bar{\gamma}_s^2} - \frac{\gamma_s^4}{\gamma_t^4} \frac{\gamma_t^2 \bar{\gamma}_t^2}{\gamma_t^2 + \bar{\gamma}_t^2} \quad (25)$$

$$= \frac{\gamma_s^2}{\gamma_s^2 + \bar{\gamma}_s^2} \left( \bar{\gamma}_s^2 - \frac{\gamma_s^2 \bar{\gamma}_t^2}{\gamma_t^2} \right) \quad (26)$$

$$= \frac{\gamma_s^2}{\gamma_t^2} \frac{\bar{\gamma}_s^2 \gamma_t^2 - \gamma_s^2 \bar{\gamma}_t^2}{\gamma_s^2 + \bar{\gamma}_s^2} \quad (27)$$

$$= \frac{\gamma_s^2}{\gamma_t^2} \frac{(\bar{\gamma}_t^2 + d_s^2) \gamma_t^2 - \gamma_s^2 (\gamma_t^2 - d_s^2)}{\gamma_s^2 + \bar{\gamma}_s^2} \quad (28)$$

$$= \frac{\gamma_s^2}{\gamma_t^2} \frac{d_s^2 (\gamma_t^2 + \bar{\gamma}_t^2)}{\gamma_s^2 + \bar{\gamma}_s^2} \quad (29)$$

$$= \frac{\gamma_s^2 (\gamma_t^2 - \gamma_s^2)}{\gamma_t^2} = \sigma_{s|t}^2, \quad (30)$$

where we use  $\gamma_s^2 + d_s^2 = \gamma_t^2$  for the last equality.  $\square$

## B Details on Table 1

**I<sup>2</sup>SB**  $\beta_{\min} = 0.0001$ ,  $\beta_{\max} = 0.02$ . The same  $\beta_t$  schedule is used regardless of being implemented as deterministic or not. For the former,  $\sigma_t = \sigma_{s|t}^2 = 0$ .

**InDI** The speed of the base degradation process is parametrized with constant time-speed  $t$ . For deterministic methods,  $\epsilon_t = 0$  and hence  $\sigma_t = \sigma_{s|t}^2 = 0$ . For stochastic methods,  $\epsilon_t = 0.01$  such that  $\sigma_{s|t}^2 = 0$ .

**IR-SDE (PF-ODE)** As mentioned in the main text, IR-SDE can also be considered a type of DDB as it obeys the marginal distribution that is characterized by (8), but with a different sampling method. Specifically, we can set  $\alpha_t = 1 - e^{-\theta t}$ ,  $\sigma_t^2 = \lambda^2(1 - e^{-2\theta t})$ , with  $\delta = 0.008$ .  $\lambda^2$  is the stationary variance of the OU-process, which is set to the noise variance of the degraded image. For all non-noisy inverse problems that we mostly consider in this work,  $\lambda^2$  is still set to  $10/255$ .

## C Experimental Details

### C.1 Implementation Details

**Models** All the models that are used throughout the work are based on pre-trained models from I<sup>2</sup>SB<sup>5</sup>. All the models are fine-tuned from the ADM [11] ImageNet  $256 \times 256$  model, hence share the same architecture as well as the specific model hyper-parameter settings.

**Inverse problem setting** All the forward operators  $\mathbf{A}$  are used in the same manner as in [26], which are adopted from DDRM [21].

**Step size, gradient** For both Algorithms 1,2, we use constant step size, but scaled to match the signal ratio of the intermediate reconstructions  $\hat{x}_{0|i}$ :  $\rho_i = (1 - \alpha_{i|i+1}^2)c$ , where  $c$  is some constant. For SR and deblurring tasks, we take  $c = 1.0$ . For JPEG restoration, we take  $c = 0.5$ .

When implementing the gradient computation for CDDB, we do not explicitly compute  $\mathbf{A}^\top$ , but rely on automatic differentiation for simplicity. This lets us unify the implementations of Algorithm 1,2 in a similar manner.

**Compute** All experiments were run using a single RTX 3090 GPU. On average, I<sup>2</sup>SB and CDDB with 1000 NFE take about 82 seconds ( $\sim 0.08$  sec. / iter). CDDB-deep takes about 193 seconds ( $\sim 0.19$  sec. / iter).

**Code Availability** Code is available at <https://github.com/HJ-harry/CDDB>

### C.2 Comparison Methods

**I<sup>2</sup>SB** We follow the default setting advised in [26] and set the default sampling schedule to be the quadratic schedule [35] with 1000 NFE. As we leverage the pre-trained checkpoints provided, deblurring and inpainting models are set to OT-ODE with no additive Gaussian noise during the sampling process.

**DPS, IIGDM** Pre-trained ADM models that were used in the original work [5, 36] are used. For DPS, we use the constant step size of 1.0 with 1000 NFE. For IIGDM, we use the constant step size of 1.0 with 100 NFE. We initially experimented with higher NFE for IIGDM but did not find a boost in performance.

**DDRM** We use 20 NFE DDIM sampling with  $\eta = 0.85$ ,  $\eta_b = 1.0$  as advised.

**DDNM** We use 100 NFE sampling with  $\eta = 0.85$  as advised. We do not use time travel for all experiments.

---

<sup>5</sup><https://github.com/NVlabs/I2SB>

| $c =$                  | CDDB  |       |       |              |              |              |       |       | CDDB-deep |       |       |       |              |              |              |       |
|------------------------|-------|-------|-------|--------------|--------------|--------------|-------|-------|-----------|-------|-------|-------|--------------|--------------|--------------|-------|
|                        | 0.0   | 0.25  | 0.5   | 0.75         | 1.0          | 1.5          | 2.0   | 3.0   | 0.0       | 0.25  | 0.5   | 0.75  | 1.0          | 1.5          | 2.0          | 3.0   |
| PSNR ( $\uparrow$ )    | 25.07 | 26.14 | 26.28 | <b>26.31</b> | <b>26.31</b> | 26.30        | 26.24 | 25.70 | 25.07     | 26.21 | 26.42 | 26.51 | 26.56        | <b>26.59</b> | 26.57        | 26.06 |
| SSIM ( $\uparrow$ )    | 0.692 | 0.744 | 0.752 | <b>0.753</b> | <b>0.753</b> | 0.751        | 0.747 | 0.729 | 0.692     | 0.745 | 0.756 | 0.760 | 0.761        | <b>0.762</b> | 0.760        | 0.747 |
| LPIPS ( $\downarrow$ ) | 0.271 | 0.218 | 0.206 | 0.203        | <b>0.201</b> | 0.202        | 0.207 | 0.244 | 0.271     | 0.226 | 0.214 | 0.209 | 0.205        | <b>0.202</b> | <b>0.202</b> | 0.227 |
| FID ( $\downarrow$ )   | 37.78 | 32.81 | 30.76 | 29.89        | 29.33        | <b>28.99</b> | 29.85 | 37.22 | 37.78     | 35.07 | 33.17 | 32.25 | <b>29.29</b> | 29.97        | 29.71        | 34.22 |

Table 4: Step size ablation on the step size for CDDB  $c := \rho_i / (1 - \alpha_{i|i+1}^2)$  using 100 test images on SR $\times$ 4-bicubic task, NFE=100. **I<sup>2</sup>SB** [26], **Chosen step size**.

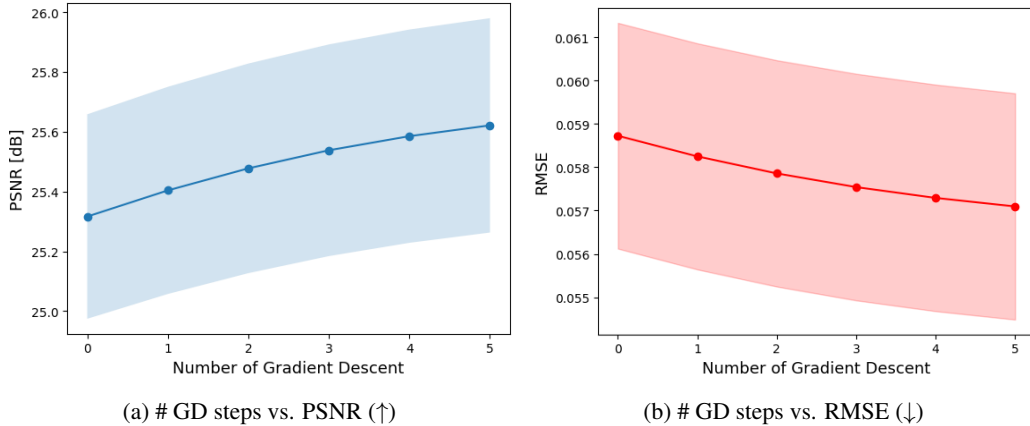

Figure 6: Effect of gradient descent (GD) steps in CDDB applied to intermediate samples  $\hat{x}_{0|i}$ . Mean  $\pm 0.1$  std indicated as colored region.

**DDS** We use 100 NFE sampling with  $\eta = 0.85$  since we did not observe additional performance gain with larger NFE.

**PnP-ADMM, ADMM-TV** Following [5], we use the implementation provided in the `scico` library [2]. For PnP-ADMM, we use  $\rho = 0.2$ , `max_iter`=12 with the DnCNN [42] denoiser. For ADMM-TV, we use as the regularization term  $\lambda \|\mathbf{D}\mathbf{x}_0\|_{2,1}$  with  $(\lambda, \rho) = (2.7e - 2, 1.4e - 1)$  for deblurring and  $(\lambda, \rho) = (2.7e - 2, 1.0e - 2)$  for SR.

### C.3 Evaluation

Out of the default 10k evaluation images from 256 $\times$ 256 ImageNet [10] used in [26], we use 1k images by interleaved sampling: i.e. Images of index 0, 10, 20, ... are used. When computing the FID score, we use the `pytorch-fid` package and compare the distribution of the ground truth images vs. the reconstructed images, rather than comparing against the training data, following the setting of [5].

## D Ablation Studies

### D.1 Step size

In Table 4, we summarize the effect of the choice of step size when implementing CDDB/CDDB-deep. Note that for *all* choice of step sizes, the quantitative metrics are superior to the I<sup>2</sup>SB counterpart, which states that CDDB stably improves the performance. We observe that for both methods,  $c = 1.0$  strikes a good balance between the distortion and the perception metrics. For CDDB-deep, taking a slightly larger step size (e.g.  $c = 1.5$ ) improves performance for certain problems, but we keep  $c = 1.0$  for unity.

## D.2 Effect of gradients during sampling

In Fig. 6, we investigate the effect of the CDDB gradient steps when applied to  $\hat{x}_{0|i}$  (i.e. intermediate denoised estimate) with  $i = N//2^6$ , 10 NFE for 300 test samples on SR $\times$ 4-bicubic task. Note that we can apply multiple GD steps to the intermediate denoised sample  $\hat{x}_{0|i}$ , which is indicated in the  $x$ -axis of the figures. Even when we apply multiple GD steps, we observe that the metrics constantly get better, establishing the stability of the proposed method.

---

<sup>6</sup>python notation
